# Supplementary material for: Nitric oxide release and related light-induced cytotoxicity of ruthenium nitrosyls with coordinated nicotinate derivatives
Source: Royal Society of Chemistry journal article supplement (doi:10.1039/d1dt02190g), 2021-01-01
Supplement: d1dt02190g1.pdf [file d1dt02190g1.pdf]

### Supporting information

#### Nitric oxide release and related light-induced cytotoxicity of ruthenium nitrosyls with coordinated nicotinate derivatives

Ivan A. Yakovlev<sup>a</sup>, Artem A. Mikhailov<sup>a</sup>, Julia A. Eremina<sup>a</sup>, Lyubov S. Klyushova<sup>b</sup>, Vladimir A. Nadolinny<sup>a</sup> and Gennadiy A. Kostin<sup>a</sup>

<sup>a</sup> Nikolaev Institute of Inorganic Chemistry, Siberian Branch of the Russian Academy of Sciences, 3 Acad. Lavrentiev Avenue, Novosibirsk 630090, Russia

<sup>b</sup> Institute of Molecular Biology and Biophysics - Subdivision of FRC FTM, 2/12 Timakova str., Novosibirsk, 630060, Russia

**Table S1.** Crystal data and refinement details.

| Identification code                | [RuNO(Et-nic) <sub>2</sub> (NO <sub>2</sub> ) <sub>2</sub> OH] ( <b>I</b> ) | [RuNO(Me-nic) <sub>2</sub> (NO <sub>2</sub> ) <sub>2</sub> OH] ( <b>II</b> ) | [RuNO(Et-nic) <sub>2</sub> (NO <sub>2</sub> ) <sub>2</sub> OH] ( <b>III</b> ) |
|------------------------------------|-----------------------------------------------------------------------------|------------------------------------------------------------------------------|-------------------------------------------------------------------------------|
| Empirical formula                  | C <sub>16</sub> H <sub>19</sub> N <sub>5</sub> O <sub>10</sub> Ru           | C <sub>14</sub> H <sub>15</sub> N <sub>5</sub> O <sub>10</sub> Ru            | C <sub>20</sub> H <sub>10</sub> N <sub>5</sub> O <sub>10</sub> Ru             |
| Formula weight                     | 542.43                                                                      | 514.38                                                                       | 581.4                                                                         |
| Temperature/K                      | 150                                                                         | 150                                                                          | 150                                                                           |
| Crystal system                     | orthorhombic                                                                | monoclinic                                                                   | monoclinic                                                                    |
| Space group                        | Pbca                                                                        | P2 <sub>1</sub> /c                                                           | Cc                                                                            |
| a/Å                                | 12.8083(5)                                                                  | 10.3004(9)                                                                   | 10.5495(12)                                                                   |
| b/Å                                | 15.1963(6)                                                                  | 16.2916(12)                                                                  | 17.8137(18)                                                                   |
| c/Å                                | 21.7231(9)                                                                  | 11.4935(9)                                                                   | 11.4884(19)                                                                   |
| α/°                                | 90                                                                          | 90                                                                           | 90                                                                            |
| β/°                                | 90                                                                          | 94.844(3)                                                                    | 96.879(3)                                                                     |
| γ/°                                | 90                                                                          | 90                                                                           | 90                                                                            |
| Volume/Å <sup>3</sup>              | 4228.2(3)                                                                   | 1921.8(3)                                                                    | 2143.4(5)                                                                     |
| Z                                  | 8                                                                           | 4                                                                            | 4                                                                             |
| ρ <sub>calc</sub> /cm <sup>3</sup> | 1.704                                                                       | 1.778                                                                        | 1.802                                                                         |
| μ/mm <sup>-1</sup>                 | 0.806                                                                       | 0.881                                                                        | 0.802                                                                         |
| F(000)                             | 2192                                                                        | 1032                                                                         | 1156                                                                          |
| Crystal size/mm <sup>3</sup>       | 0.04 × 0.05 × 0.24                                                          | 0.04 × 0.04 × 0.08                                                           | 0.01 × 0.02 × 0.10                                                            |
| Radiation                          | MoKα (λ = 0.71073)                                                          | MoKα (λ = 0.71073)                                                           | MoKα (λ = 0.71073)                                                            |

|                                                  |                                                               |                                                               |                                                               |
|--------------------------------------------------|---------------------------------------------------------------|---------------------------------------------------------------|---------------------------------------------------------------|
| 2 $\theta$ range for data collection/ $^{\circ}$ | 3.75 to 72.652                                                | 3.968 to 64.244                                               | 4.512 to 52.754                                               |
| Index ranges                                     | $-20 \leq h \leq 21, -24 \leq k \leq 24, -35 \leq l \leq 36$  | $-15 \leq h \leq 13, -24 \leq k \leq 24, -16 \leq l \leq 15$  | $-13 \leq h \leq 12, -22 \leq k \leq 21, -14 \leq l \leq 14$  |
| Reflections collected                            | 158947                                                        | 24070                                                         | 13119                                                         |
| Independent reflections                          | 9852 [ $R_{\text{int}} = 0.0760, R_{\text{sigma}} = 0.0364$ ] | 6065 [ $R_{\text{int}} = 0.0487, R_{\text{sigma}} = 0.0505$ ] | 3874 [ $R_{\text{int}} = 0.0789, R_{\text{sigma}} = 0.0847$ ] |
| Data/restraints/parameters                       | 9852/0/292                                                    | 6065/0/274                                                    | 3874/2/292                                                    |
| Goodness-of-fit on $F^2$                         | 1.078                                                         | 1.053                                                         | 1.051                                                         |
| Final R indexes [ $I \geq 2\sigma(I)$ ]          | $R_1 = 0.0424, wR_2 = 0.1035$                                 | $R_1 = 0.0350, wR_2 = 0.0753$                                 | $R_1 = 0.0432, wR_2 = 0.0841$                                 |
| Final R indexes [all data]                       | $R_1 = 0.0696, wR_2 = 0.1158$                                 | $R_1 = 0.0490, wR_2 = 0.0834$                                 | $R_1 = 0.0675, wR_2 = 0.1041$                                 |
| Largest diff. peak/hole / $e \text{ \AA}^{-3}$   | 0.63/-1.41                                                    | 0.47/-0.64                                                    | 0.84/-0.56                                                    |
| Flack parameter                                  | -                                                             | -                                                             | 0.43(4)                                                       |

**Table S2.** Selected bond lengths and angles of **(I)**, **(II)** and  $[\text{RuNO}(\text{Et-nic})_2(\text{NO}_2)_2\text{OH}]$  crystallized in Cc (**(I)'**).

| Bond/angle             | <b>(I)</b>         | <b>(II)</b>        | <b>(I)'</b>        |
|------------------------|--------------------|--------------------|--------------------|
| Ru-NO                  | 1.767(2)           | 1.762(2)           | 1.750(8)           |
| N-O                    | 1.150(2)           | 1.150(3)           | 1.15(1)            |
| Ru-OH                  | 1.910(2)           | 1.933(2)           | 1.930(6)           |
| Ru-NO <sub>2</sub>     | 2.069(2); 2.072(2) | 2.061(2); 2.080(2) | 2.071(9); 2.075(9) |
| Ru-N <sub>nic</sub>    | 2.122(2); 2.123(2) | 2.113(2); 2.131(2) | 2.12(1); 2.12(1)   |
| Ru-N-O                 | 173.4(2)           | 171.0(2)           | 170.4(8)           |
| HO-Ru-NO <sub>2</sub>  | 89.1(1); 89.5(1)   | 88.1(1); 86.7(1)   | 87.6(3); 88.3(3)   |
| HO-Ru-N <sub>nic</sub> | 86.6(1); 86.8(1)   | 87.2(7); 85.7(1)   | 85.9(3); 87.2(3)   |

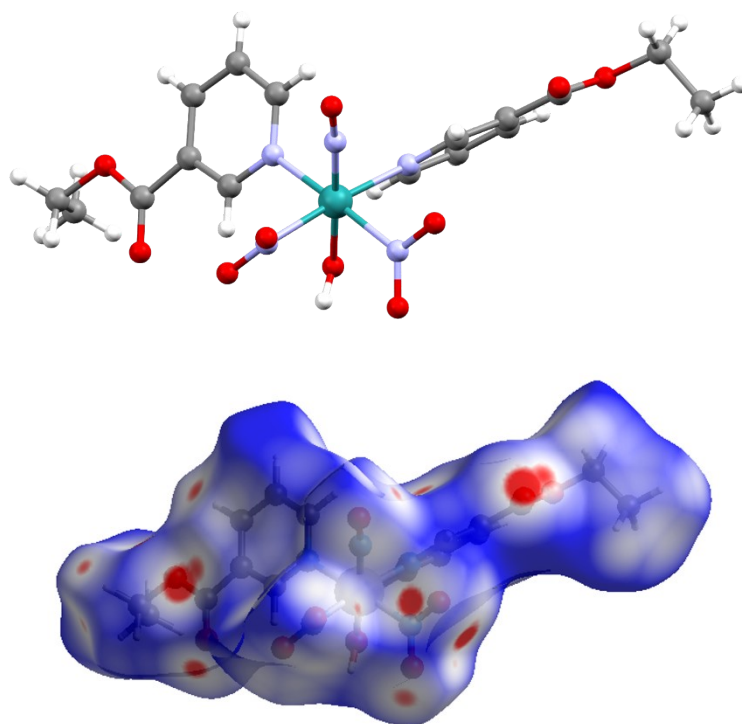

**Fig. S1.** Three-dimensional Hirshfeld surface map of **(I)**, generated for the whole intermolecular interactions. The red areas show the most pronounced interactions, where the strongest are formed by the oxygen atoms of nitrites and ether groups.

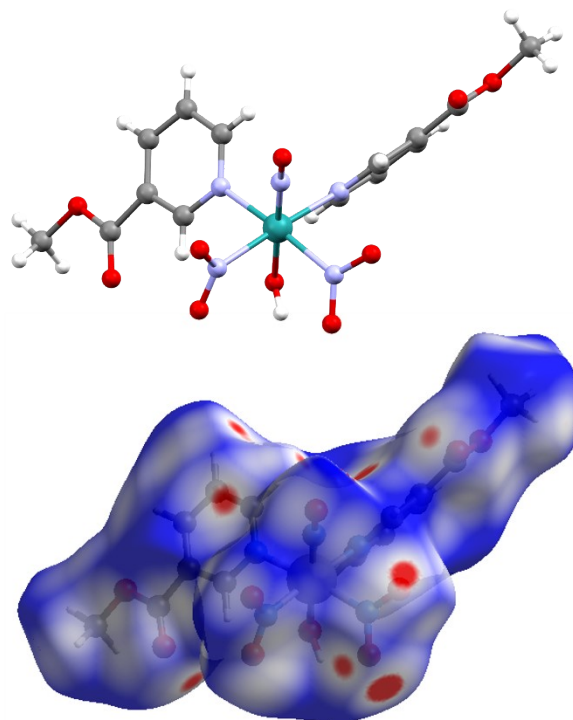

**Fig. S2.** Three-dimensional Hirshfeld surface map of **(II)**, generated for the whole intermolecular interactions. The red areas show the most pronounced interactions, where the strongest are formed by the oxygen atoms of nitrites and ether groups.

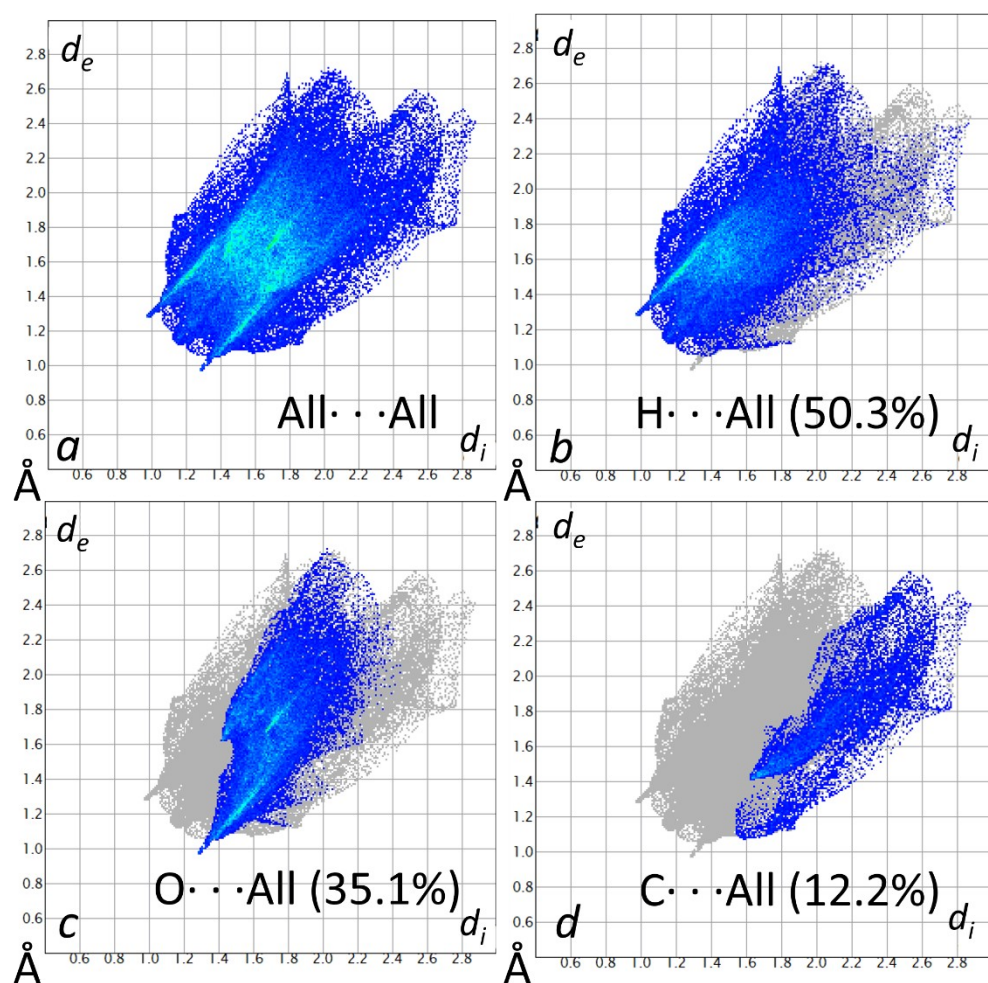

**Fig. S3.** Selected two-dimensional fingerprint plots based on the Hirshfeld surfaces of the (II) for the all (a), hydrogen (b), oxygen (c) and carbon (d) intermolecular interactions.

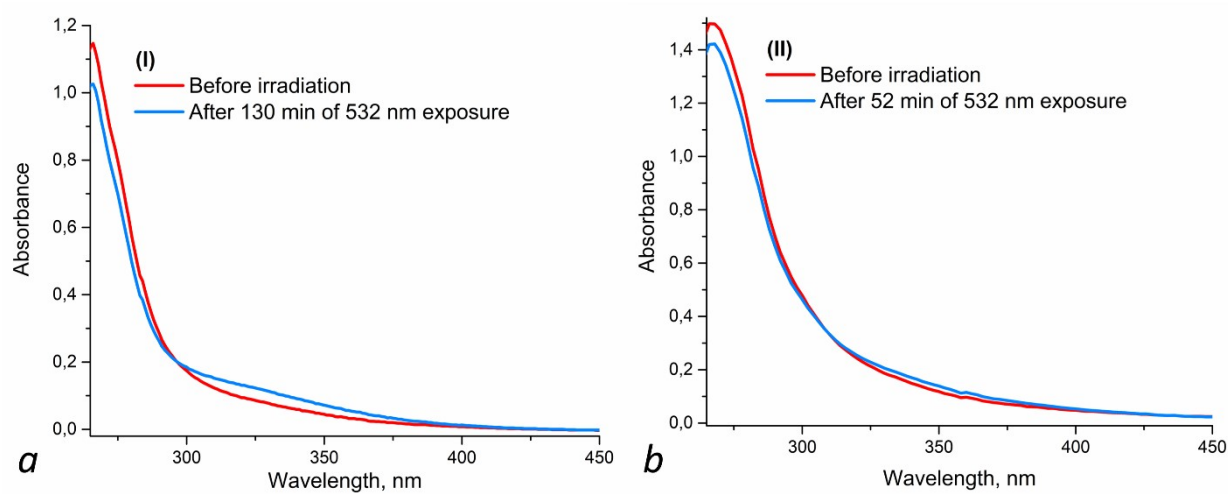

**Fig. S4.** The evolution of UV-vis spectra of (I) (a) and (II) (b) after irradiation at 532 nm.

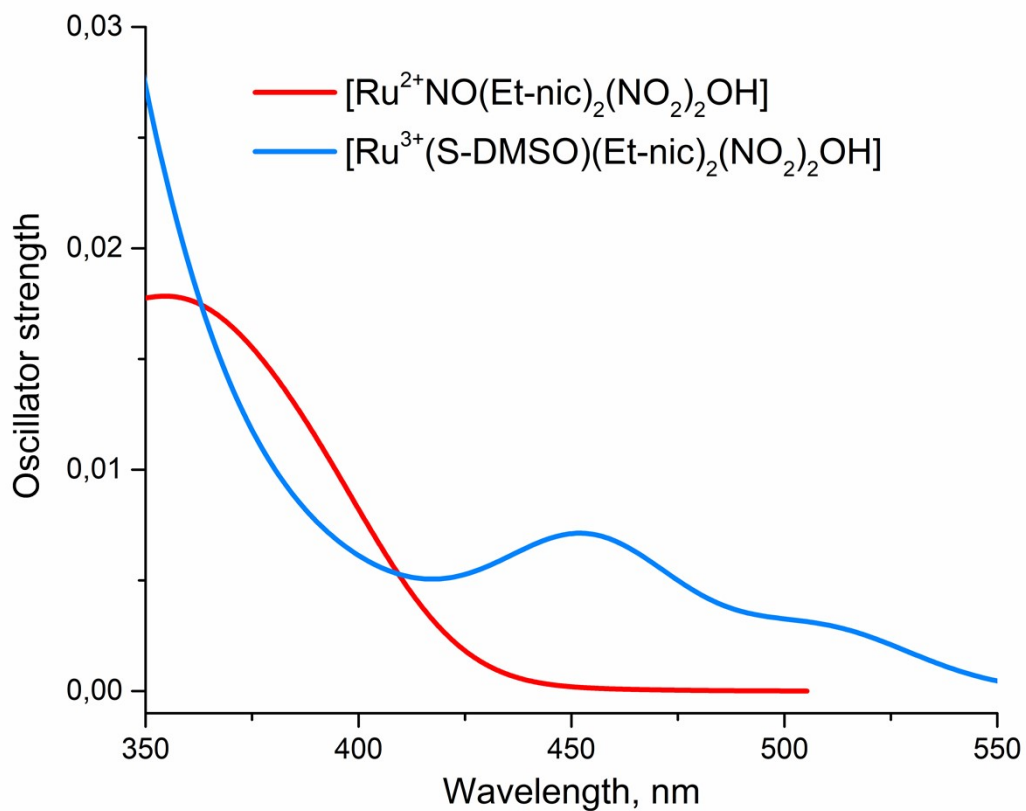

**Fig. S5.** Calculated (DFT, B3LYP, TZP) UV-vis spectra of **(I)** and its corresponding product of the photolysis.

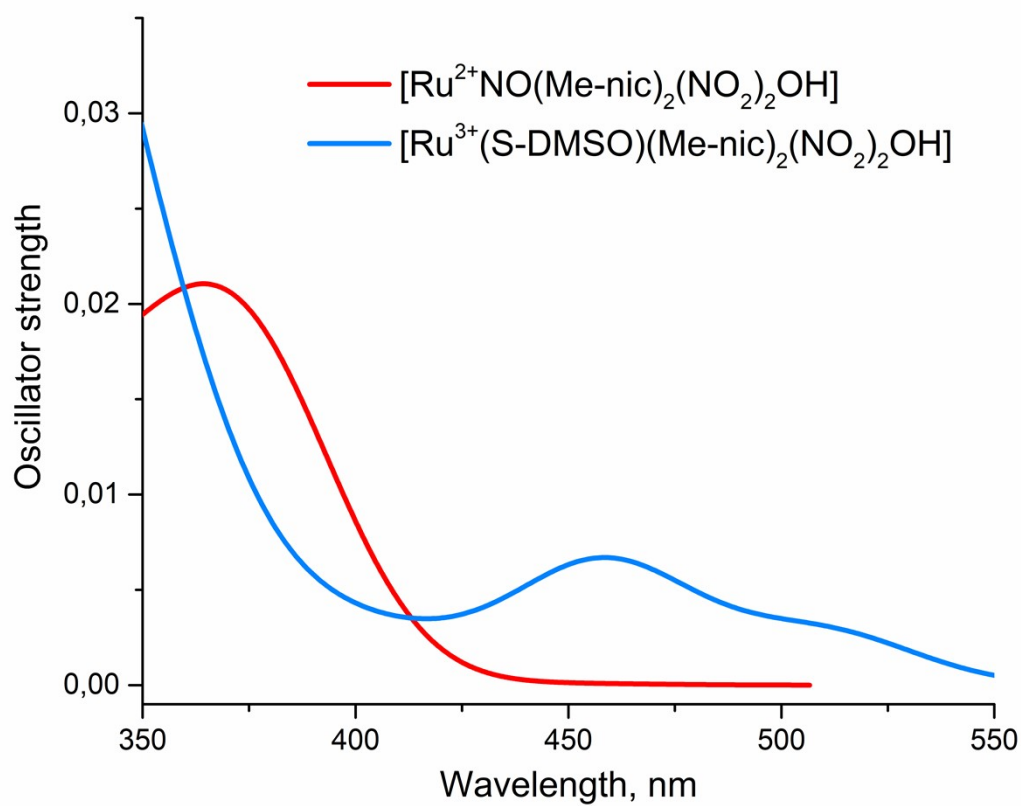

**Fig. S6.** Calculated (DFT, B3LYP, TZP) UV-vis spectra of **(II)** and its corresponding product of the photolysis.

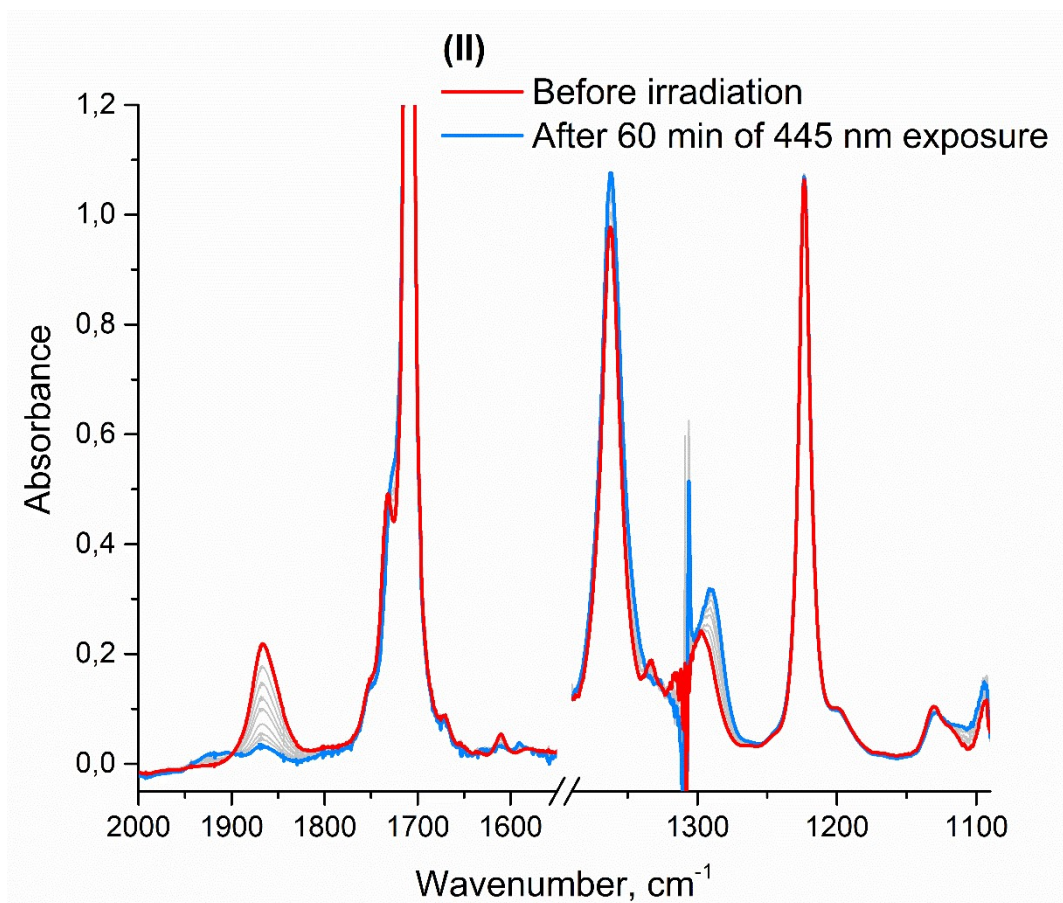

**Fig. S7.** The evolution of IR spectra of (II) in after 445 nm exposure.
